1 **Differential Host Gene Signatures in Response to *Mycobacterium tuberculosis* Infection**

2

3

4 **Loubna Tazi<sup>1\*</sup>, Ping Wang<sup>2</sup>, Myriam Fornage<sup>2</sup>**

5

6

7 <sup>1</sup>Department of Medical Microbiology & Immunology, School of Medicine, University of  
8 California Davis, Davis, CA 95616

9 <sup>2</sup>Brown Foundation Institute of Molecular Medicine, McGovern Medical School, The University  
10 of Texas Health Science Center at Houston, Houston, TX 77030

11

12

13 \*Corresponding author: Dr. Loubna Tazi

14 Mailing address: University of California Davis, School of Medicine, Department of Medical  
15 Microbiology & Immunology, 451 Health Science Drive Suite 5503, Room 5521, Davis, CA  
16 95616

17 Phone: +1 530-752-7807

18 Fax: +1 530-752-7240

19 E-mail: [ltazi@ucdavis.edu](mailto:ltazi@ucdavis.edu)

20

21

22

23 Short title: Differential host response to tuberculosis

24 **ABSTRACT**

25 Tuberculosis (TB) represents a global public health threat and is the leading cause of morbidity  
26 and mortality worldwide. Effective control of TB is complicated with the emergence of multidrug  
27 resistance. Yet, there is still a fundamental gap in understanding the complex and dynamic  
28 interactions between different *Mycobacterium tuberculosis* strains and the host. In this project, we  
29 investigated the host immune response to different *M. tuberculosis* strains, including avirulent or  
30 virulent and rifampin-resistant or isoniazid-resistant strains in THP-1 cells. We identified major  
31 differences in the gene response profiles in response to infection with these strains. The expression  
32 of IDO1 and IL-1 $\beta$  in the infected cells was stronger in all virulent *M. tuberculosis* strains. The  
33 most striking result was the overexpression of many interferon-stimulated genes (ISGs) in cells  
34 infected with the isoniazid-resistant strain, compared to the rifampin-drug resistant strain and the  
35 drug-sensitive strain. A transcription regulation analysis of the differentially expressed genes in  
36 infected THP-1 cells implicated two major transcription factors, NF- $\kappa$ B and STAT1. The  
37 differentially expressed ISGs in response to the isoniazid-resistant *M. tuberculosis* strain were  
38 associated with STAT1 signaling, while the expression of many cytokines, such IL-1 $\beta$ , was  
39 associated with NF- $\kappa$ B signaling. Our data suggest that the isoniazid-resistant *M. tuberculosis*  
40 strain preferentially activates STAT1 in response to cGAS-STING activation and induces a host  
41 immune response signature that is characteristic of isoniazid resistance. This study has a potential  
42 to provide important new insights into TB pathogenesis and to characterize host gene signatures  
43 specifically involved in isoniazid-resistant TB.

44

45

46

## 47 INTRODUCTION

48 Tuberculosis (TB) represents a disease of global public health importance and a leading cause of  
49 morbidity and mortality worldwide, surpassing HIV/AIDS (1, 2). One third of the world's  
50 population is currently infected with *Mycobacterium tuberculosis*, with more than 10 million new  
51 cases of active TB reported worldwide resulting in more than 1.6 million deaths annually. The  
52 emergence of drug-resistant TB and the increasing incidence of multidrug-resistant (MDR) and,  
53 more recently, of extensively drug-resistant (XDR) and totally drug-resistant (TDR) *M.*  
54 *tuberculosis* strains are a highly significant public health threat and jeopardize current efforts to  
55 TB control and prevention (3-5).

56 Besides the ability to acquire mutations in target genes conferring resistance to  
57 antimicrobial drugs, *M. tuberculosis* strains also show a high degree of intrinsic resistance to most  
58 common antibiotics (6). This allows the mycobacteria to efficiently resist anti-tuberculous  
59 treatment. As a consequence, the molecular characterization of drug-resistant *M. tuberculosis*  
60 strains remains technically challenging (7-9). There is an urgent need to develop alternative and  
61 more sensitive approaches to identify *M. tuberculosis* strains in order to implement better measures  
62 to minimize the acquisition of further drug resistance, prevent TB transmission, and ultimately  
63 improve TB control and prevention strategies.

64 The *M. tuberculosis* cell wall has a complex composition and structure. It is considered to  
65 be a major virulence factor and to promote the natural resistance of *M. tuberculosis* to antibiotics  
66 (10). Mycolic acids represent the hallmark component of the *M. tuberculosis* cell wall and their  
67 biosynthesis and regulation are the targets of isoniazid (INH), one of the cornerstone drug of TB  
68 treatment (11, 12). Interestingly, the cell wall is significantly thicker in drug-resistant *M.*

69 *tuberculosis* strains compared to drug-sensitive strains, further underscoring the importance of  
70 mycolic acids biosynthesis in INH-resistant *M. tuberculosis* strains (13).

71 Cell wall lipids in *M. tuberculosis* play a significant role in modulating the host immune  
72 response, as well as its pathogenic processes and virulence (14-17). However, our understanding  
73 of the host-*M. tuberculosis* interaction is still limited, and many fundamental gaps remain in how  
74 this interaction could be altered in response to different *M. tuberculosis* strains. Infections with  
75 different *M. tuberculosis* genotypes have major impacts on host-pathogen interaction, which can  
76 lead to substantial differences in the host immune responses (18-20). Some mycobacterial lineages  
77 (e.g., Beijing) even showed polymorphic properties in immune response genes, suggesting a  
78 possible human-pathogen co-evolution (21). The immune response of infected macrophages also  
79 showed a wide variation in the response to different *M. tuberculosis* lineages (22). However,  
80 further work is needed to explore the host immune response to different *M. tuberculosis* strains. In  
81 this study, we tackled this question and investigated the host immune response to different *M.*  
82 *tuberculosis* strains, including avirulent or virulent and rifampin-resistant or isoniazid-resistant  
83 strains in THP-1 cells. Shifting the focus on the host-pathogen interaction in *M. tuberculosis*  
84 infection and the identification of specific host responses to *M. tuberculosis* strains have the  
85 potential to develop biomarkers for novel and more sensitive diagnostic tools for TB. The  
86 identification of TB patients at an early stage, particularly those carrying drug-resistant strains, is  
87 crucial in order to begin an appropriate therapy as quickly as possible and improve our efforts for  
88 TB control.

89

## 90 **MATERIALS AND METHODS**

### 91 **Cell line treatment and *M. tuberculosis* infection**

92 For this study, we used human monocytic THP-1 cells (American Type Culture Collection;  
93 Catalog no. TIB-202). The cells were maintained in RPMI 1640 medium supplemented with 10%  
94 heat-inactivated fetal bovine serum (FBS) at 37°C and 5% CO<sub>2</sub> in a humidified incubator. THP-1  
95 cells were subsequently differentiated for 48 hours with 10 ng/ml phorbol 12-myristate 13-acetate  
96 (PMA). The cells were then infected with four different reference mycobacterial strains (H37Ra,  
97 H37Rv, H37Rv-INH-R, H37Rv-RIF-R), kindly provided by Dr. Lisa Y. Armitige (Heartland  
98 National TB Center). Both H37Ra (American Type Culture Collection; Product no. 25177) and  
99 H37Rv (American Type Culture Collection; Product no. 27294) are drug-sensitive, whereas  
100 H37Rv-INH-R (American Type Culture Collection; Product no. 35822) and H37Rv-RIF-R  
101 (American Type Culture Collection; Product no. 35838), both of which are derivatives of H37Rv,  
102 are resistant to isoniazid and rifampin, respectively. We used two time points for infection (4 and  
103 24 hours) in order to monitor differences in gene expression patterns for differentially expressed  
104 genes. In addition to the infected THP-1 samples, we also used uninfected control cells (mock-  
105 infected with PBS) as negative controls.

106

### 107 **RNA isolation and processing**

108 Total RNA was extracted from controls and infected cells (10 samples in total, with 5 samples for  
109 each time point), using Trizol according to the manufacturer's protocol. RNA was then suspended  
110 in RNase-free water and stored at -80°C until further use. RNA quality was assessed to verify its  
111 integrity using Agilent 2100 Bioanalyzer (Agilent Technologies) and RNA quantity was evaluated  
112 by spectrophotometry using NanoDrop 2000 (NanoDrop Technologies). All RNA samples showed  
113 good RNA yield and no RNA degradation. Total RNA was then reverse transcribed to cDNA,  
114 amplified, labeled and hybridized to separate arrays using the GeneChip Human Exon 1.0 ST

115 Array (Affymetrix, USA), according to the manufacturer's instructions. For transcriptional  
116 profiling, we used triplicate hybridization assays in our microarray experiments in order to assess  
117 variability among independent labeling reactions and hybridizations. Quality control of the  
118 hybridized arrays was also performed for each sample. A visual inspection of the scanned images  
119 was conducted looking for any defects, areas of high background, or areas of low signal. The spike-  
120 in controls were checked as well to examine for hybridization uniformity.

121

## 122 **Microarray data analysis**

123 Data from all 10 samples were preprocessed, summarized at the transcript-cluster (gene) level, and  
124 RMA normalized using Affymetrix Power Tools. Prior to differential expression analysis, low-  
125 variability genes were filtered out, leaving 13,460 genes. Differential expression analyses were  
126 conducted using the R/Bioconductor package *limma* (23). Significant differential expression was  
127 defined by an adjusted p-value of less than 0.05. The visualization of the identified differentially  
128 expressed genes in the volcano plots was performed using base R graphics.

129

## 130 **RESULTS**

131 In this study, we generated gene expression profiles of THP-1 cell lines infected with different  
132 reference *M. tuberculosis* strains (H37Ra, H37Rv, H37Rv-INH-R, H37Rv-RIF-R). The choice for  
133 this study design allowed us to focus on *M. tuberculosis* strain-specific alterations in the  
134 transcriptional response and to avoid putative confounding differences that might be related to the  
135 genetic variability of clinical *M. tuberculosis* strains and macrophages isolated from different  
136 subjects. The multidimensional scaling (MDS) plot for the microarray expression data clearly

137 showed well-separated grouping according to infections vs mock infections and time points of  
138 infections, and also that replicate samples clustered together (Fig. 1).

139         Among the total number of differentially expressed genes between infected THP-1 cells  
140 and mock-infected cells, we found major differences in those genes, depending on the *M.*  
141 *tuberculosis* strain used for infection. A higher number of differentially expressed genes was  
142 detected in infected cells with all virulent *M. tuberculosis* strains (H37Rv, H37Rv-INH-R, H37Rv-  
143 RIF-R), compared to the infection with the non-virulent strain (H37Ra) (Fig. 2). This difference  
144 was even more pronounced at 24 h post-infection when we performed pairwise comparisons in  
145 infected cells (Fig. 3). Based on this finding, the subsequent analyses were therefore based on that  
146 time of infection (24 h), instead of 4 h post-infection. A total of 3,622 differentially expressed  
147 genes ( $p < 0.05$ ) was identified in response to H37Rv-INH-R infection.

148         At 24 h post-infection, we identified differences in the gene response profiles between the  
149 strains. The expression of IDO1 and IL-1 $\beta$  was enhanced in all infections with the virulent  
150 reference strains, except H37Ra (Fig. 4). However, the most striking and unexpected result was  
151 the overexpression of many interferon-stimulated genes (ISGs) in the THP-1 cells infected with  
152 H37Rv-INH-R, in comparison to cells infected with the other *M. tuberculosis* strains (Fig. 5). Our  
153 data also showed that protein kinase R (PKR/eIF2aK2) is most strongly induced in THP-1 cells  
154 infected with H37Rv-INH-R. A subset of the differentially expressed host genes is shown in figure  
155 5. In this figure, we can see a panel of differences in the host expression profile. The gene  
156 expression changes between infections with H37Rv-INH-R vs the other strains are also shown in  
157 the volcano plots (Fig. 6).

158         To determine the key transcription factors that potentially regulate the differentially  
159 expressed genes in infected THP-1 cells, we performed a transcription regulation analysis using

160 pathway relation network (pathway-net: <http://pathwaynet.princeton.edu/>) (24). Two major  
161 transcription factors, nuclear factor kappa-light-chain-enhancer of activated B cells (NF- $\kappa$ B) and  
162 signal transducer and activator of transcription 1 (STAT1), were identified in this analysis. Our  
163 analysis showed that the differentially expressed ISGs in H37Rv-INH-R were associated with  
164 STAT1 signaling, while the expression of many cytokines, such IL-1 $\beta$ , was associated with NF-  
165  $\kappa$ B signaling.

166

## 167 **DISCUSSION**

168 Our study showed major differences in the host response to different *M. tuberculosis* strains. We  
169 also showed that the infection with H37Rv-INH-R induced an unexpected overexpression of ISGs  
170 in THP-1 cells. Our data indicated that STAT1 is the major transcription factor associated with the  
171 differentially expressed genes (e.g., ISGs) in response to H37Rv-INH-R infection.

172 Multiple recognition and signaling pathways for the host innate immune responses to *M.*  
173 *tuberculosis* have been documented and characterized (25). The main signaling pathways in *M.*  
174 *tuberculosis* are TLR2-MyD88 and cGAS-STING. In this study, the overexpression of ISGs in the  
175 cells infected with H37Rv-INH-R suggests a stronger induction of STAT1 as a result of cGAS-  
176 STING activation, rather than TLR2-MyD88 activation in the differential host response to INH-  
177 resistant TB. In addition to the overexpression of ISGs in the cells infected with the isoniazid-  
178 resistant *M. tuberculosis* strain, we also found a higher induction of PKR/eIF2aK2 in those cells.  
179 This result is even more exciting, since there has been recently an increasing interest in  
180 PKR/eIF2aK2, a key player in the innate immune response to viral infections, for its potential  
181 ability to improve TB control (26-29). Recent studies have also shown an important role of NF-



182  $\kappa$ B dynamics in TB pathogenesis (30, 31). NF- $\kappa$ B was the other major transcription factor  
183 associated with the differentially expressed genes, which was identified in this study.

184 Resistance to INH is linked to all multidrug-resistant forms of TB (MDR, XDR, TDR).  
185 Several studies have shown that INH resistance is acquired first, followed by resistance to rifampin  
186 and the other anti-TB drugs (32-36), which highlights the significant impact of INH in the success  
187 of treatment in active and latent TB and warrants further efforts to understand the global burden  
188 of INH-resistant TB (37). Fig. 7 shows our proposed model for the host signaling response to the  
189 different reference *M. tuberculosis* strains (H37Ra, H37Rv, H37Rv-INH-R, H37Rv-RIF-R).

190 The mechanism of INH resistance is complex and has been thoroughly studied in an  
191 attempt to improve early diagnosis of INH-resistant *M. tuberculosis* strains (36, 38-44). It is mainly  
192 mediated by mutations in the *katG* gene or in the *inhA* regulatory regions (45). INH is activated  
193 by the catalase-peroxidase encoded by *katG*. This process interferes with the biosynthesis of  
194 mycolic acids by inhibiting NADH-dependent enoyl-ACP reductase encoded by *inhA*. Mutations  
195 in other genes have been also associated with INH resistance, however they are not as common as  
196 the ones in *katG* (42 to 95%) and *inhA* (6 to 43%) in *M. tuberculosis* clinical strains and their mode  
197 of action in INH resistance has not been fully elucidated (46). Nevertheless, not all INH-resistant  
198 strains harbor defined genetic mutations associated with resistance to this drug, which complicates  
199 efforts to identify those strains. There are also INH resistance-conferring mutations that cannot be  
200 detected by current molecular diagnostics approaches (33). In addition, some studies indicated that  
201 some *M. tuberculosis* strains acquire drug resistance at higher rates, suggesting a higher mutation  
202 rate in these strains and a higher probability that these strains will develop multidrug resistance  
203 (47, 48).

204           Given our results, the differential host immune response to different *M. tuberculosis* strains  
205 (e.g. overexpression of ISGs in the cells infected with H37Rv-INH-R) provides opportunities to  
206 develop host biomarkers for INH resistance and defines a new facet of host-pathogen interactions  
207 that differentially regulate signaling pathways in response to INH-resistant and other *M.*  
208 *tuberculosis* strains. The characterization of such host response signatures has the potential to  
209 develop novel diagnostic tools and improve our understanding of the complex and dynamic  
210 interactions between *M. tuberculosis* strains and the host.

211

## 212 **ACKNOWLEDGMENTS**

213 We gratefully thank Dr. Lisa Y. Armitige for providing all reference *M. tuberculosis* strains used  
214 in this study.

215

216

217

218

219

220

221

222

223

224

225

226

227 **REFERENCES**

- 228 1. World Health Organization. Global tuberculosis report 2018. Geneva, Switzerland.
- 229 2. Foster N, Vassall A, Cleary S, Cunnama L, Churchyard G, Sinanovic E. The economic burden  
230 of TB diagnosis and treatment in South Africa. *Soc. Sci. Med.* 2015; 130: 42-50.
- 231 3. Blumberg HM, Burman WJ, Chaisson RE, Daley CL, Etkind SC, Friedman LN, *et al.*  
232 American Thoracic Society/Centers for Disease Control and Prevention/Infectious Diseases  
233 Society of America: treatment of tuberculosis. *Am. J. Respir. Crit. Care Med.* 2003; 167: 603-  
234 662.
- 235 4. Velayati AA, Farnia P, Masjedi MZ. The totally drug resistant tuberculosis (TDR-TB). *Int. J.*  
236 *Clin. Exp. Med.* 2013; 6: 307-309.
- 237 5. Klopper M, Warren RM, Hayes C, Gey van Pittius NC, Streicher EM, Müller B, *et al.*  
238 Emergence and spread of extensively and totally drug-resistant tuberculosis, South Africa.  
239 *Emerg. Infect. Dis.* 2013; 19: 449-455.
- 240 6. Gygli SM, Borrell S, Trauner A, Gagneux S. Antimicrobial resistance in *Mycobacterium*  
241 *tuberculosis*: mechanistic and evolutionary perspectives. *FEMS Microbiol. Rev.* 2017; 41: 354-  
242 373.
- 243 7. Gröschel MI, Walker TM, van der Werf TS, Lange C, Niemann S, Merker M. Pathogen-based  
244 precision medicine for drug-resistant tuberculosis. *PLoS Pathog.* 2018; 14: e1007297.
- 245 8. CRyPTIC Consortium and the 100,000 Genomes Project. Prediction of susceptibility to first-  
246 line tuberculosis drugs by DNA sequencing. *N. Engl. J. Med.* 2018; 379: 1403-1415.
- 247 9. Kouchaki S, Yang Y, Walker TM, Walker AS, Wilson DJ, Peto TEA, *et al.* Application of  
248 machine learning techniques to tuberculosis drug resistance analysis. *Bioinformatics* 2018; 1-  
249 7.

- 250 10. Niederweis M, Danilchanka O, Huff J, Hoffmann C, Engelhardt H. Mycobacterial outer  
251 membranes: in search of proteins. *Trends Microbiol.* 2010; 18: 109-116.
- 252 11. Glickman MS, Cox JS, Jacobs WR Jr. A novel mycolic acid cyclopropane synthetase is  
253 required for cording, persistence, and virulence of *Mycobacterium tuberculosis*. *Mol. Cell.*  
254 2000; 5: 717-727.
- 255 12. Takayama K, Wang L, David HL. Effect of isoniazid on the in vivo mycolic acid synthesis,  
256 cell growth, and viability of *Mycobacterium tuberculosis*. *Antimicrob. Agents Chemother.*  
257 1972; 2: 29-35.
- 258 13. Velayati AA, Farnia P, Ibrahim TA, Haroun RZ, Kuan HO, Ghanavi J, *et al.* Differences in  
259 cell wall thickness between resistant and non-resistant strains of *Mycobacterium tuberculosis*:  
260 Using transmission electron microscopy. *Chemotherapy* 2009; 55: 303-307.
- 261 14. Rocha-Ramírez LM, Estrada-García I, Lopez-Marin LM, Segura-Salinas E, Mendez-Aragon  
262 P, Van Soolingen D, *et al.* *Mycobacterium tuberculosis* lipids regulate cytokines, TLR-2/4 and  
263 MHC class II expression in human macrophages. *Tuberculosis* 2008; 88: 212-220.
- 264 15. Barry CE 3<sup>rd</sup>. Interpreting cell wall ‘virulence factors’ of *Mycobacterium tuberculosis*. *Trends*  
265 *Microbiol.* 2001; 9: 237-241.
- 266 16. Mendelson M, Walters S, Smith I, Kaplan G. Strain-specific mycobacterial lipids and the  
267 stimulation of protective immunity to tuberculosis. *Tuberculosis* 2005; 85: 407-413.
- 268 17. Cox JS, Chen B, McNeil M, Jacobs Wr Jr. Complex lipid determines tissue-specific replication  
269 of *Mycobacterium tuberculosis* in mice. *Nature* 1999; 402: 79-83.
- 270 18. López B, Aguilar D, Orozco H, Burger M, Espitia C, Ritacco V, *et al.* A marked difference in  
271 pathogenesis and immune response induced by different *Mycobacterium tuberculosis*  
272 genotypes. *Clin. Exp. Immunol.* 2003; 133: 30-37.

- 273 19. Caws M, Thwaites G, Dunstan S, Hawn TR, Lan NT, Thuong NT, *et al.* The influence of host  
274 and bacterial genotype on the development of disseminated disease with *Mycobacterium*  
275 *tuberculosis*. *PLoS Pathog.* 2008; 4: e1000034.
- 276 20. Krishnan N, Malaga W, Constant P, Caws M, Tran TH, Salmons J, *et al.* *Mycobacterium*  
277 *tuberculosis* lineage influences innate immune response and virulence and is associated with  
278 distinct cell envelope lipid profiles. *PLoS One* 2011; 6: e23870.
- 279 21. Parwati I, van Crevel R, van Soolingen D. Possible underlying mechanisms for successful  
280 emergence of the *Mycobacterium tuberculosis* Beijing genotype strains. *Lancet Infect. Dis.*  
281 2010; 10: 103-111.
- 282 22. Portevin D, Gagneux S, Comas I, Young D. Human macrophage responses to clinical isolates  
283 from the *Mycobacterium tuberculosis* complex discriminate between ancient and modern  
284 lineages. *PLoS Pathog.* 2011; 7: e1001307.
- 285 23. Ritchie ME, Phipson B, Wu D, Hu Y, Law CW, Shi W, *et al.* *limma* powers differential  
286 expression analyses for RNA-sequencing and microarray studies. *Nucleic Acids Res.* 2015; 43:  
287 e47.
- 288 24. Park CY, Krishnan A, Zhu Q, Wong AK, Lee YS, Troyanskaya OG. Tissue-aware data  
289 integration approach for the inference of pathway interactions in metazoan organisms.  
290 *Bioinformatics* 2015, 31: 1093-1101.
- 291 25. Mishra A, Akhtar S, Jagannath C, Khan A. Pattern recognition receptors and coordinated  
292 cellular pathways involved in tuberculosis immunopathogenesis: emerging concepts and  
293 perspectives. *Mol. Immunol.* 2017; 87: 240-248.

- 294 26. Cabanski M, Steinmüller M, Marsh LM, Surdziel E, Seeger W, Lohmeyer J. PKR regulates  
295 TLR2/TLR4-dependent signaling in murine alveolar macrophages. *Am. J. Respir. Cell. Mol.*  
296 *Biol.* 2008; 38: 26-31.
- 297 27. Cheung BKW, Lee DCW, Li JCB, Lau YL, Lau ASY. A role for double-stranded RNA-  
298 activated protein kinase PKR in *Mycobacterium*-induced cytokine expression. *J. Immunol.*  
299 2005; 175: 7218-7225.
- 300 28. Mundhra S, Bryk R, Hawryluk N, Zhang T, Jiang X, Nathan CF. Evidence for dispensability  
301 of protein kinase R in host control of tuberculosis. *Eur. J. Immunol.* 2018; 48: 612-620.
- 302 29. Deb A, Haque SJ, Mogensen T, Silverman RH, Williams BRG. RNA-dependent protein kinase  
303 PKR is required for activation of NF- $\kappa$ B by INF- $\gamma$  in a STAT1-independent pathway. *J.*  
304 *Immunol.* 2001; 166: 6170-6180.
- 305 30. Fallahi-Sichani M, Kirschner DE, Linderman JJ. NF- $\kappa$ B signaling dynamics play a key role in  
306 infection control in tuberculosis. *Front. Physiol.* 2012; 3:170.
- 307 31. Bai X, Feldman NE, Chmura K, Ovrutsky AR, Su W-L, Griffin L, *et al.* Inhibition of nuclear  
308 factor-kappa B activation decreases survival of *Mycobacterium tuberculosis* in human  
309 macrophages. *PLoS One* 2013; 8: e61925.
- 310 32. Manson AL, Cohen KA, Abeel T, Desjardins CA, Armstrong DT, Barry CE 3<sup>rd</sup>, *et al.* Genomic  
311 analysis of globally diverse *Mycobacterium tuberculosis* strains provides insights into the  
312 emergence and spread of multidrug resistance. *Nat. Genet.* 2017; 49: 395-402.
- 313 33. Cohen KA, Abeel T, Manson McGuire A, Desjardins CA, Munsamy V, Shea TP, *et al.*  
314 Evolution of extensively drug-resistant tuberculosis over four decades: Whole genome  
315 sequencing and dating analysis of *Mycobacterium tuberculosis* isolates from KwaZulu-Natal.  
316 *PLoS Med.* 2015; 12: e1001880.

- 317 34. Eldholm V, Monteserin J, Rieux A, Lopez B, Sobkowiak B, Ritacco V, Balloux F. Four  
318 decades of transmission of a multidrug-resistant *Mycobacterium tuberculosis* outbreak strain.  
319 *Nat. Commun.* 2015; 6: 7119.
- 320 35. Izu A, Cohen T, Degruittola V. Bayesian estimation of mixture models with prespecified  
321 elements to compare drug resistance in treatment-naïve and experienced tuberculosis cases.  
322 *PLoS Comput. Biol.* 2013; 9: e1002973.
- 323 36. Dookie N, Rambaran S, Padayatchi N, Mahomed S, Naidoo K. Evolution of drug resistance in  
324 *Mycobacterium tuberculosis*: a review on the molecular determinants of resistance and  
325 implications for personalized care. *J. Antimicrob. Chemother.* 2018; 73: 1138-1151.
- 326 37. Stagg HR, Lipman MC, McHugh TD, Jenkins HE. Isoniazid resistant tuberculosis – a cause  
327 for concern? *Int. J. Tuberc. Lung Dis.* 2017; 21: 129-139.
- 328 38. Unissa AN, Subbian S, Hanna LE, Selvakumar N. Overview on mechanisms of isoniazid  
329 action and resistance in *Mycobacterium tuberculosis*. *Infect. Genet. Evol.* 2016; 45: 474-492.
- 330 39. Palomino JC, Martin A. Drug resistance mechanisms in *Mycobacterium tuberculosis*.  
331 *Antibiotics* 2014; 3: 317-340.
- 332 40. Almeida Da Silva PE, Palomino JC. Molecular basis and mechanisms of drug resistance in  
333 *Mycobacterium tuberculosis*: classical and new drugs. *J. Antimicrob. Chemother.* 2011; 66:  
334 1417-1430.
- 335 41. Sun G, Luo T, Yang C, Dong X, Li J, Zhu Y, *et al.* Dynamic population changes in  
336 *Mycobacterium tuberculosis* during acquisition and fixation of drug resistance in patients. *J.*  
337 *Infect. Dis.* 2012; 206: 1724-1733.
- 338 42. Hazbón MH, Brimacombe M, Bobadilla del Valle M, Cavatore M, Guerrero MI, Varma-Basil  
339 M, *et al.* Population genetics study of isoniazid resistance mutations and evolution of

- 340 multidrug-resistant *Mycobacterium tuberculosis*. *Antimicrob. Agents Chemother.* 2006; 50:  
341 2640-2649.
- 342 43. Ramaswamy SV, Reich R, Dou S-J, Jasperse L, Pan X, Wanger A, *et al.* Single nucleotide  
343 polymorphisms in genes associated with isoniazid resistance in *Mycobacterium tuberculosis*.  
344 *Antimicrob. Agents Chemother.* 2003; 47: 1241-1250.
- 345 44. Vilchèze C, Jacobs WR Jr. The mechanism of isoniazid killing: clarity through the scope of  
346 genetics. *Annu. Rev. Microbiol.* 2007; 61: 35-50.
- 347 45. Cohen T, Becetta MC, Murray MB. Isoniazid resistance and the future of drug-resistant  
348 tuberculosis. *Microb. Drug Resist.* 2004; 10: 280-285.
- 349 46. Seifert M, Catanzaro D, Catanzaro A, Rodwell TC. Genetic mutations associated with  
350 isoniazid resistance in *Mycobacterium tuberculosis*: a systematic review. *PLoS ONE* 2015; 10:  
351 e0119628.
- 352 47. Ford CB, Sha RR, Maeda MK, Gagneux S, Murray MB, Cohen T, *et al.* *Mycobacterium*  
353 *tuberculosis* mutation rate estimates from different lineages predict substantial differences in  
354 the emergence of drug-resistant tuberculosis. *Nat. Genet.* 2013; 45: 784-790.
- 355 48. Borrell S, Gagneux S. Infectiousness, reproductive fitness and evolution of drug-resistant  
356 *Mycobacterium tuberculosis*. *Int. J. Tuberc. Lung Dis.* 2009; 13: 1456-1466.

357

358

359

360

361

362



363 **FIGURES**

364 **Figure 1:**

365 MDS Plot for differential gene expression of *M. tuberculosis*-infected vs mock-infected THP-1  
366 cell lines at 4 h and 24 h post-infection.

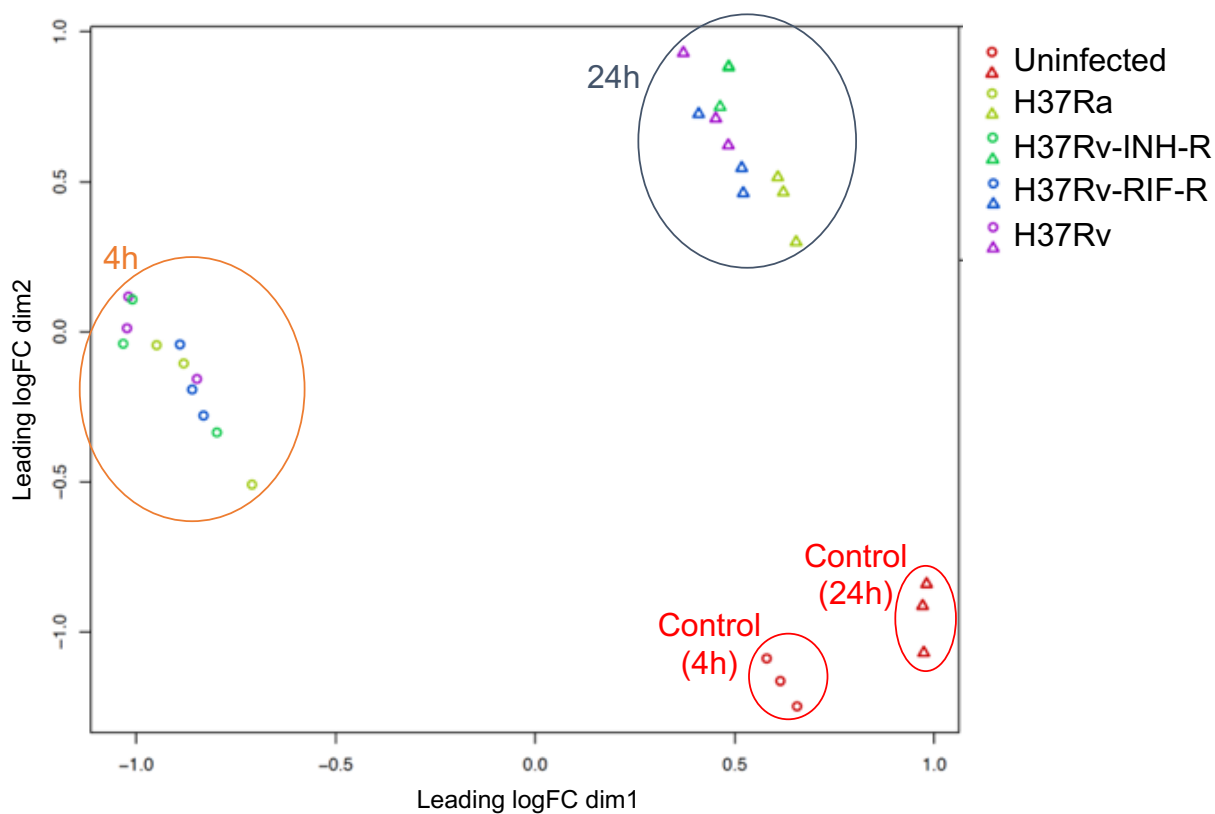

367

368

369

370

371

372

373

374

375

376 **Figure 2:**

377 Number of differentially expressed genes in *M. tuberculosis*-infected THP-1 cell lines, relative to  
378 mock-infected cells, at 4 h and 24 h post-infection ( $p < 0.05$ ).

379

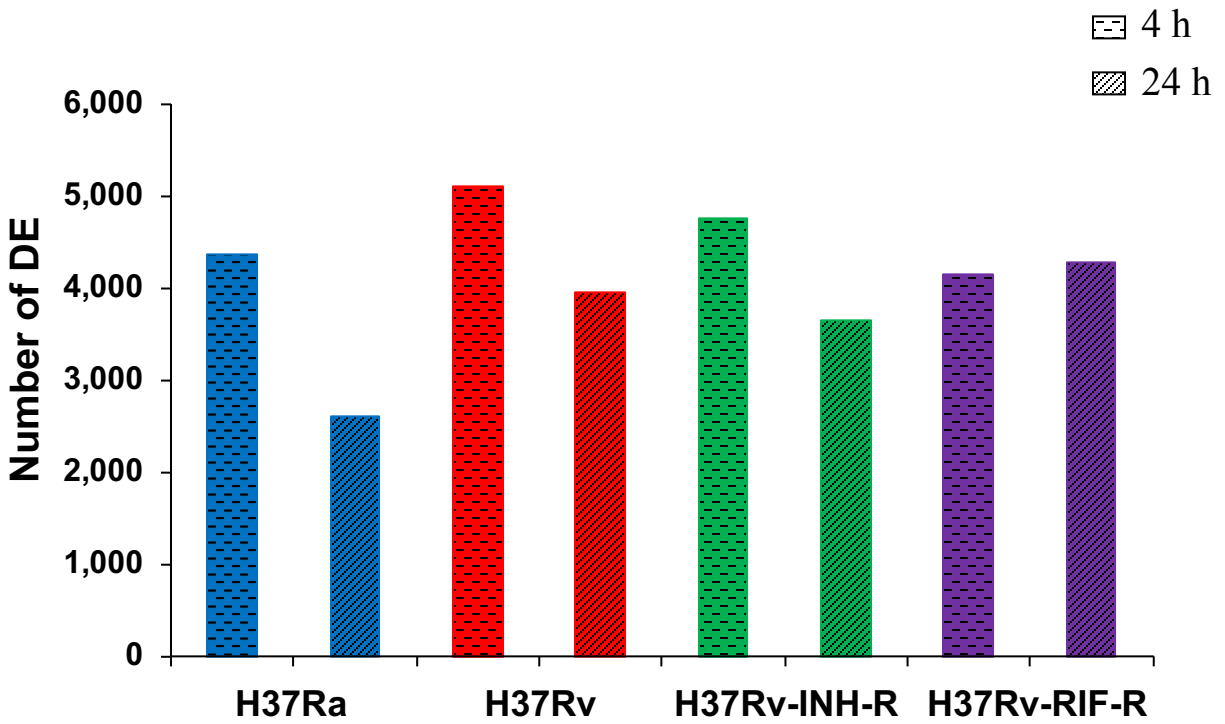

380

381

382

383

384

385

386

387

388 **Figure 3:**

389 Number of differentially expressed genes in the pairwise comparisons of *M. tuberculosis*-infected

390 THP-1 cell lines at 4 h and 24 h post-infection ( $p < 0.05$ ).

391

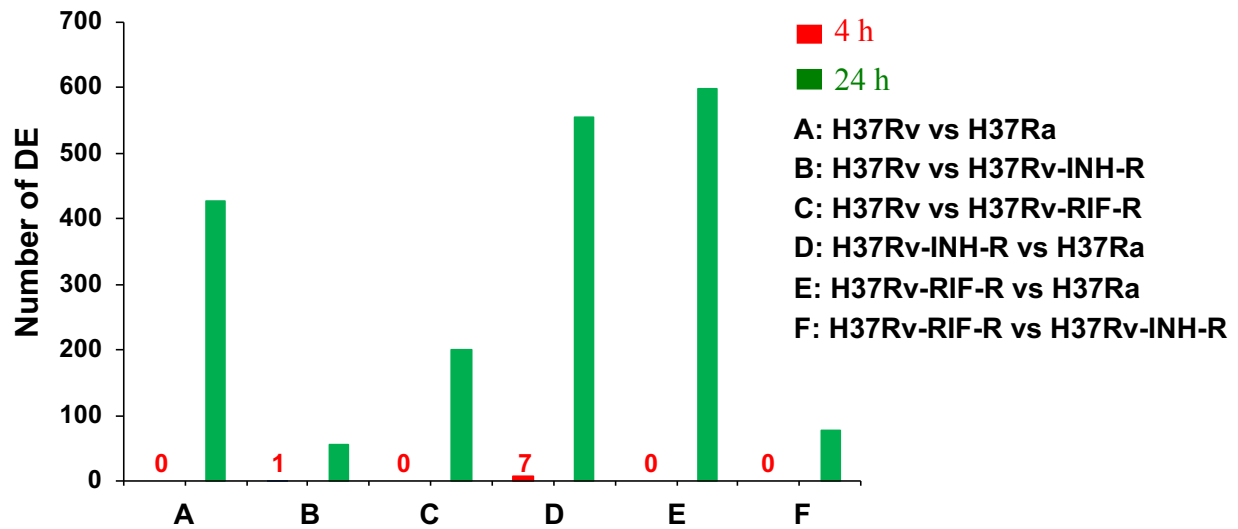

392

393

394

395

396

397

398

399

400

401

402

403

404

405 **Figure 4:**

406 Fold change in the expression of IDO1 and IL-1 $\beta$  in THP-1 cell lines infected with reference *M.*  
407 *tuberculosis* strains (24 h post-infection; p<0.05).

408

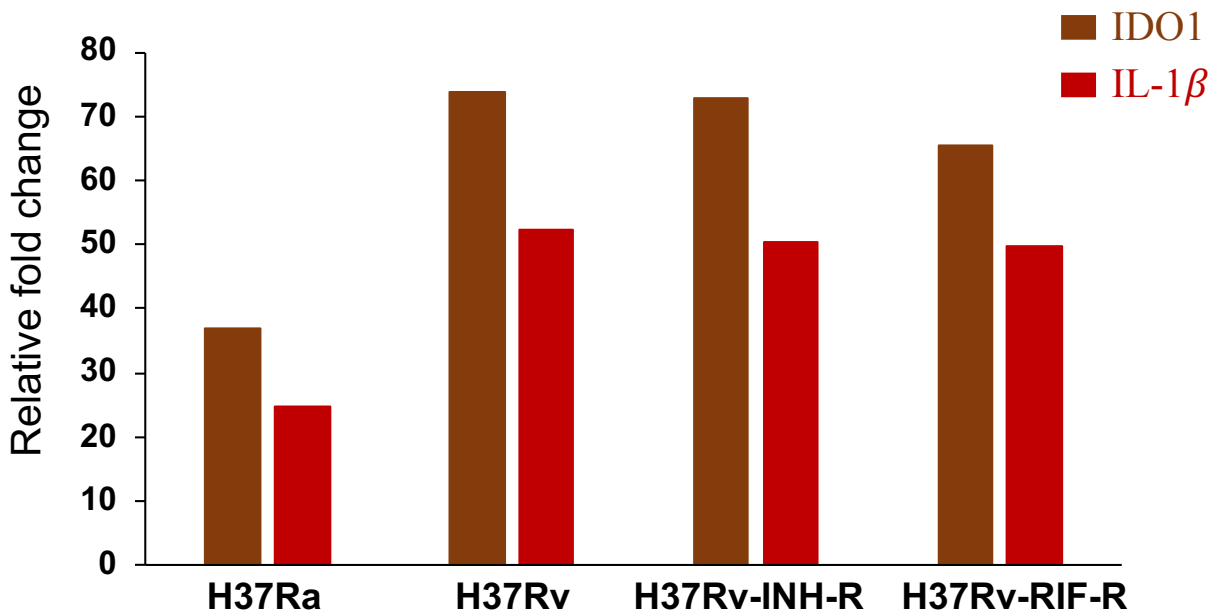

409

410

411

412

413

414

415

416

417

418

419

420 **Figure 5:**

421 Fold change in gene expression in THP-1 cell lines infected with reference *M. tuberculosis* strains

422 (24 h post-infection;  $p < 0.05$ ).

423

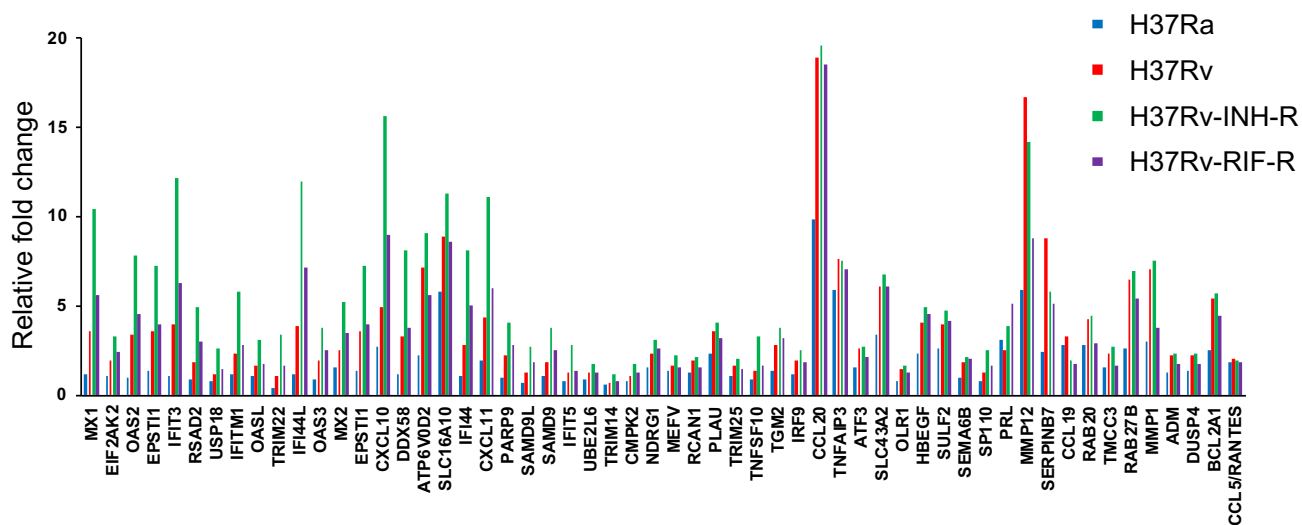

437 **Figure 6:**

438 Volcano plots displaying differential expression genes in THP-1 cells in three different comparison  
439 groups (24 h post-infection;  $p < 0.05$ ). The 20 highly significant differentially expressed genes in  
440 each plot are indicated in the insets.

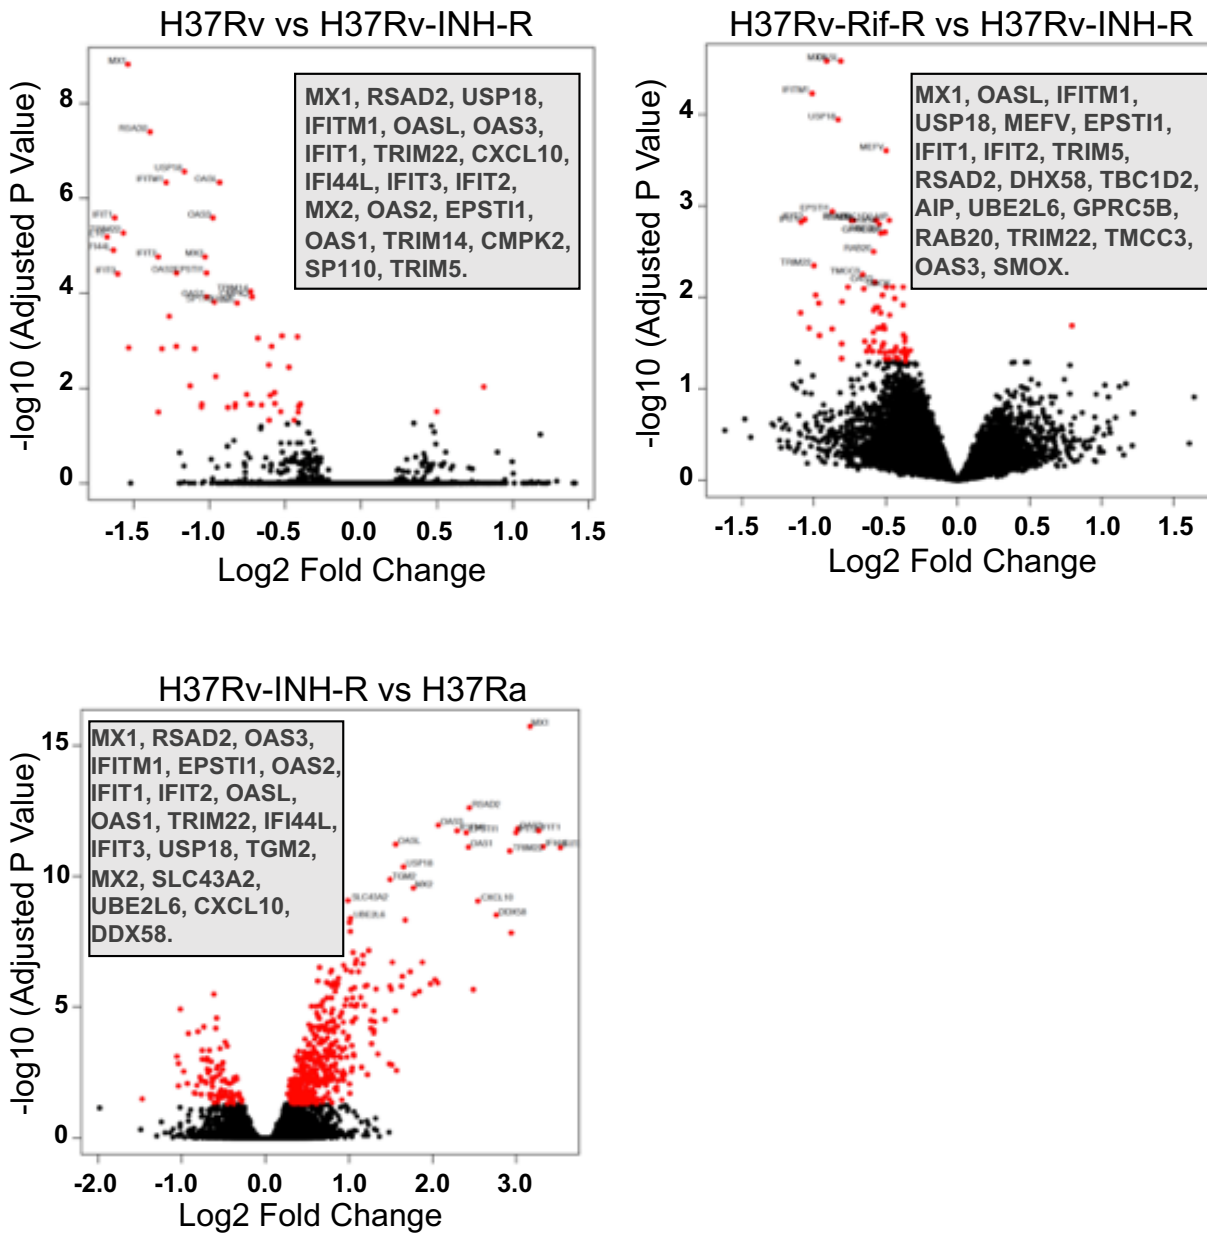

441

442

443

444 **Figure 7:**

445 Proposed model for host signaling response to reference *M. tuberculosis* strains. H37Rv-INH-R  
446 induces the highest expression of ISGs and PKR, compared to the other strains, as indicated by the  
447 circles and the big font size.

448

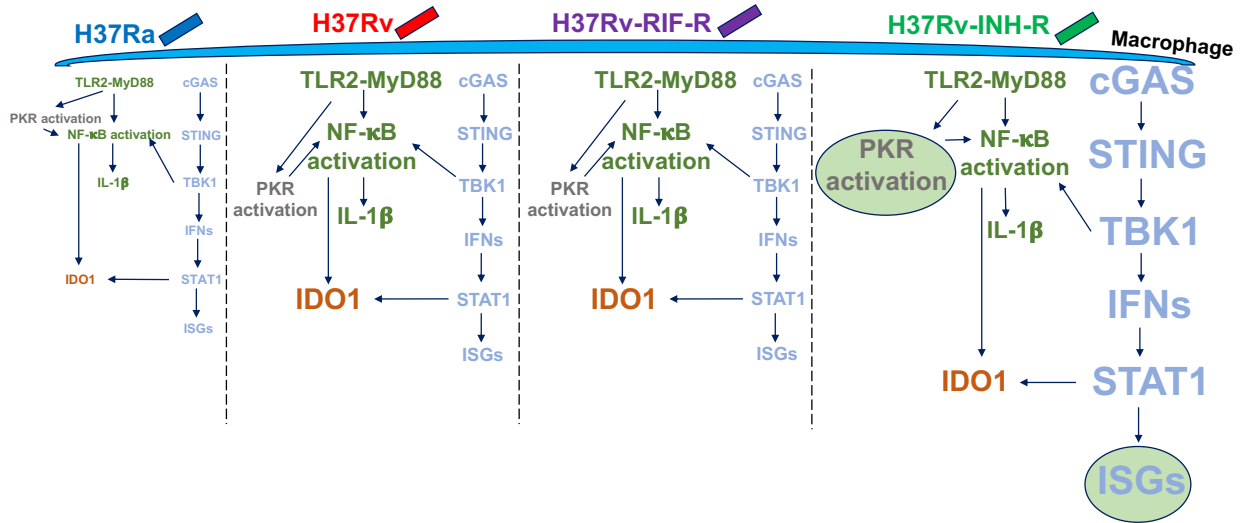

449
